# Supplementary material for: Structural and Functional Characteristics of Mitral Paravalvular Leakage Identified by Multimodal Imaging and Their Implication on Clinical Presentation
Source: MDPI journal article supplement (doi:10.3390/jcm10020222), 2021-01-10
Supplement: s1 [file s1]

## SUPPLEMENTARY DATA

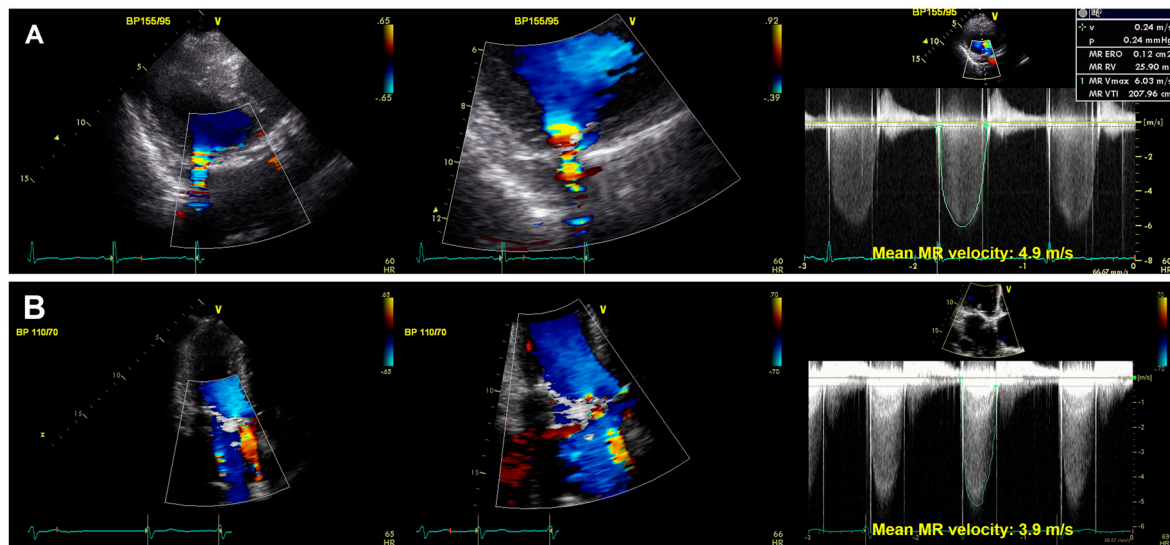

**Figure S1.** (A) Patient with mitral PVL at a posteromedial location (Off-axis view) (B) Patient with mitral PVL at anteromedial location (Apical 3 chamber view). PVL, paravalvular leakage.

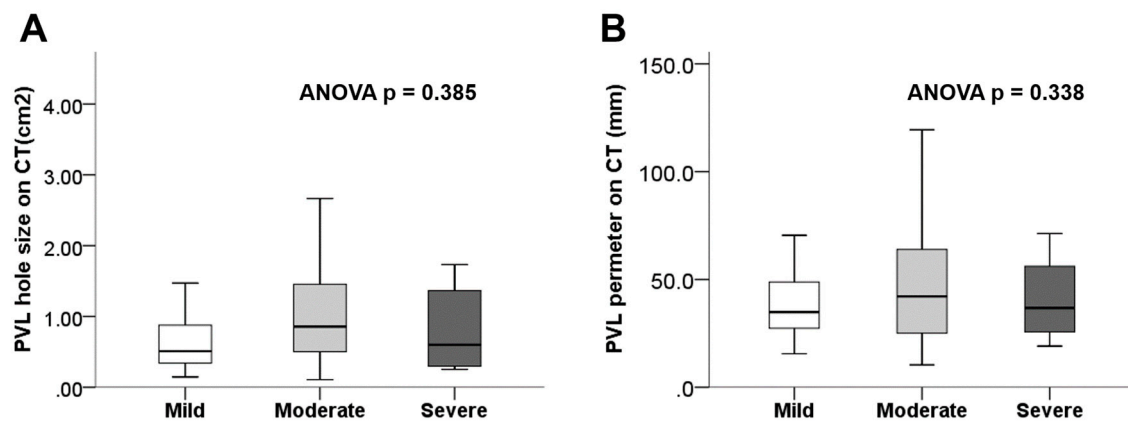

**Figure S2.** (A) PVL hole area (B) PVL perimeter according to the PVL severity classified by conventional guideline. PVL, paravalvular leakage.

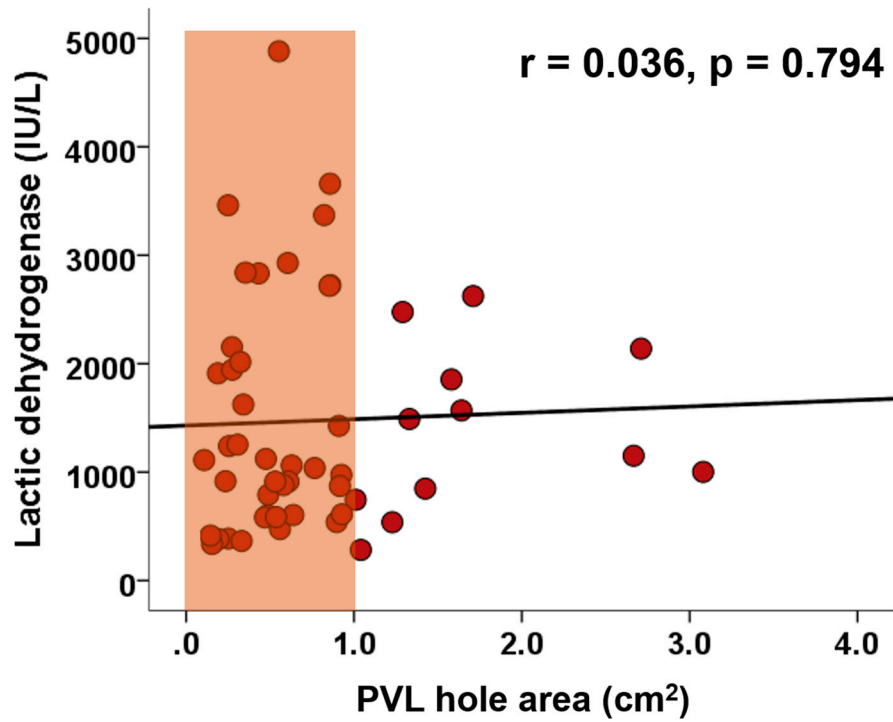

**Figure S3.** Association between degree of hemolysis and PVL hole area. PVL, paravalvular leakage.

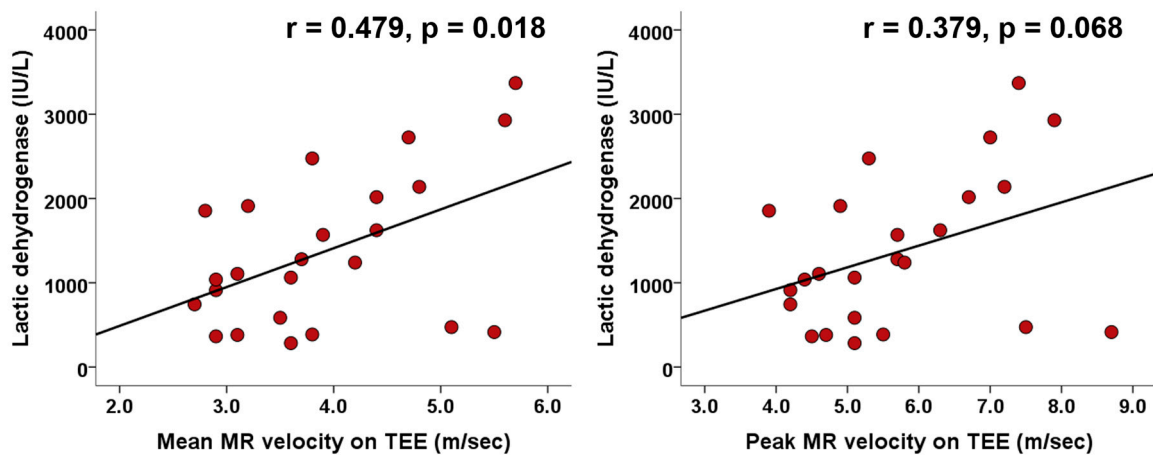

**Figure S4.** Associations between degree of hemolysis and MR velocity measured by TEE (A) mean MR velocity through the PVL (B) peak MR velocity through the PVL. MR, mitral regurgitation; PVL, paravalvular leakage.

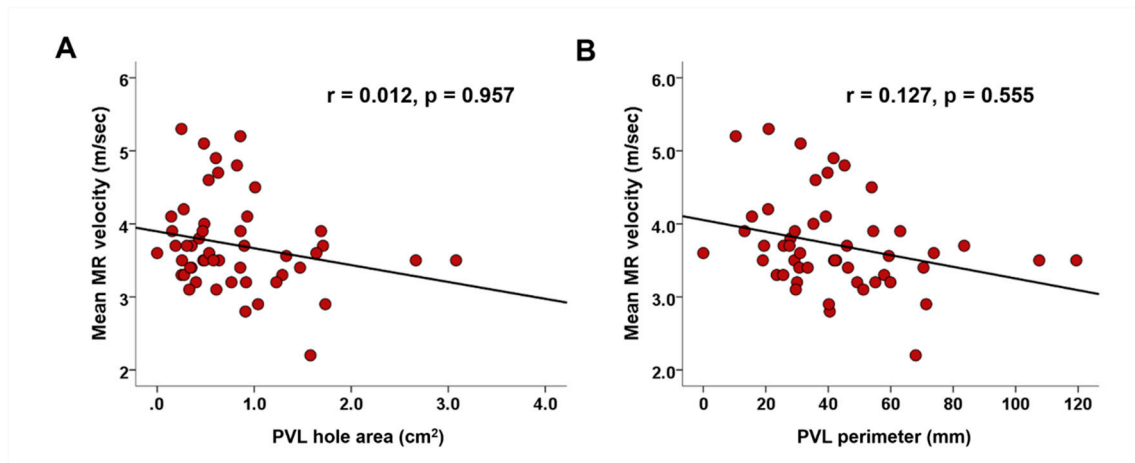

**Figure S5.** Associations between mean MR velocity through the PVL and PVL hole area (A) and PVL perimeter (B). MR, mitral regurgitation; PVL, paravalvular leakage
